# Supplementary material
Source: PubMed Central journal article supplement (PMC2746973)

## **SUPPLEMENTAL DATA**

### **Plasmids**

The bacterial expression vector for NC-biotinylated CasSD was derived from pET-28a(+) (Novagen) and encoded a protein; AviTag, CasSD (rat Cas 115-420) and AviTag from the amino- to carboxy-terminal. The vector for C-biotinylated CasSD lacked the amino-terminal AviTag sequence. The bacterial expression vector for NY/CY-NC-biotinylated CasSD was also derived from pET-28a(+) and encoded a chimeric protein; YFP-N (EYFP-V68L/Q69K 1-154), AviTag, CasSD, AviTag, and YFP-C (EYFP 155-238) from the amino- to carboxy-terminal. The vector for NY/CY-C-biotinylated CasSD lacked the amino-terminal AviTag sequence. The vectors for His<sub>6</sub>-YFP and His<sub>6</sub>-YFP-N were constructed by subcloning the sequences encoding full-length YFP (EYFP-V68L/Q69K 1-238) (Miyawaki et al., 1999) and YFP-N to pET-28a(+), respectively. GST-YFP-C was constructed by subcloning the sequence encoding YFP-C into pET-41a(+) (Novagen). The bacterial expression vectors for cdb3 and GST-RalGDS-RBD were provided from P. S. Low (Purdue University) and A. Sakakibara (University of Virginia), respectively. The eukaryotic expression vectors for human c-Src and Fyn were provided from T. Yamamoto (University of Tokyo). The expression vector for SrcY527F, a mutant form of Src that has tyrosine 527 mutated to phenylalanine, was provided from H. Hirai (University of Tokyo). The expression vectors for human c-Yes and GFP-Rap1 were provided from M. Sudol (Mount Sinai Medical Center, New York) and M. Matsuda

(Kyoto University), respectively. The expression vectors for monomeric RFP (Clontech) and RFP-Cas were constructed by PCR using pCAGGS (Niwa et al., 1991) as a parent vector. The expression vector for RFP-Cas15YF in pCAGGS was constructed by PCR using an expression vector for a mutant form of Cas that has all fifteen YxxPs in the substrate domain mutated to FxxPs (Shin et al., 2004) as a template. The expression vector for GFP-Cas $\Delta$ SD encoding GFP fused to Cas lacking the substrate domain (Nakamoto et al., 1996) was constructed using pSSR $\alpha$  (Toyoshima et al., 1993) as a parent vector.

### **In Vitro Kinase Assay of Immunoprecipitated Src**

$4 \times 10^5$  SYF cells or SYF cells stably expressing c-Src were either stretched or left unstretched. 1 min after stretching or without stretching, cells were washed with cold PBS, solubilized with a lysis buffer (1% NP-40, 0.25% sodium deoxycholate, 20 mM Tris pH 7.5, 150 mM NaCl, 5 mM EDTA, 1 mM Na<sub>3</sub>VO<sub>4</sub>, 10 mM NaF, 1 mM PMSF, 20  $\mu$ g/ml aprotinin) and cleared by centrifugation. Equivalent small portions of each lysate were mixed with SDS sample buffer and subjected directly to SDS-PAGE to analyze for Cas phosphorylation. Remaining portions of each lysate were incubated with an anti-Src antibody (GD11) for 2 h at 4 °C, then protein A/G immobilized on gel (UltraLink<sup>®</sup> Immobilized Protein A/G, PIERCE) was added and incubated another 1 h at 4°C. The complex bound to the gel was washed 3 times with the lysis buffer and 3 times with the kinase buffer (20 mM Hepes pH 7.5, 150 mM NaCl, 10 mM MgCl<sub>2</sub>, 1 mM PMSF, 20  $\mu$ g/ml aprotinin, 0.5 mM EGTA). Immunoprecipitates thus obtained were incubated with acid-treated enolase in the kinase buffer containing 0.5 mM ATP, 3 mM MnCl<sub>2</sub>, 1 mM

DTT, 1 mM Na<sub>3</sub>VO<sub>4</sub> for 10 min at 30 °C. The kinase reaction was terminated by the addition of SDS sample buffer and equivalent portions of each sample were subjected to SDS-PAGE. Src kinase activity was analyzed by measuring the phosphorylation of enolase with anti-phospho-tyrosine (4G10, Upstate Biotechnology) immunoblotting. Immunoprecipitated Src, i.e. Src protein in the kinase reaction, was quantified by anti-Src immunoblotting.

### **Preparation of Biotinylated Proteins**

Various forms of biotinylated CasSD were prepared using Biotin AviTag<sup>TM</sup> technology (Avidity). The Biotin AviTag sequence consists of 15 residues (GLNDIFEAQKIEWHE), which is specifically and efficiently biotinylated by the protein biotin ligase, Bir A (Schatz, 1993). Biotinylated AviTag-fused proteins were obtained by co-expression with BirA in bacteria (BL21 Star<sup>TM</sup>, Invitrogen) cultured in NZCYM medium containing d-biotin (50 µM, Research Organics) at the time of IPTG induction. We measured the biotinylation of each AviTag-fused protein with SDS-PAGE followed by Coomassie brilliant blue staining and affinity blotting using avidin (horseradish peroxidase-conjugated streptavidin, GE Healthcare). The molar ratio of biotin to AviTag-fused protein was determined using biotinylated bovine serum albumin (BSA) (Sigma; the molar ratio of biotin to protein was 8: 1) as a standard and confirmed to be 2: 1 in NC-biotinylated CasSD and NY/CY-NC-biotinylated CasSD, and 1: 1 in C-biotinylated CasSD and NY/CY-C-biotinylated CasSD.

### **Covalent Avidin-coating of Latex Membrane and Preparation of Biotinylated**

### **Proteins Specifically Bound to Avidin-coated Latex Membrane**

The amine-reactive groups were introduced onto the surface of latex membrane using Friedal-Crafts chemistry by treatment with an aqueous solution containing 40% (w/w) glutaraldehyde (Sigma-Aldrich), 10% (w/w) Dioxane (Sigma-Aldrich) and 0.04% (w/w) cerium trichloride (Sigma-Aldrich) at 90 °C for 3 h. After 4 washes with 99.5% ethanol, the membrane was set in an adjustable tension ring (Coats & Clark, Greer, SC). The central area of the upper surface of the membrane (defined with a glass cylinder: inner diameter = 13 mm, see Figure 3A bottom) was incubated with 0.05% (w/w) avidin (Neutravidin, PIERCE) in 20 mM phosphate buffer (pH 7.6) containing 4 mM TCEP HCl (PIERCE) at room temperature overnight. Unbound avidin was cleared and reactive groups remaining on the latex surface were quenched by washing 4 times with 3 x concentrated TBS (1 x TBS: 20 mM Tris pH 7.4, 137 mM NaCl) containing 1% Triton X-100 and 3 mM TCEP HCl. The avidin-coated latex surface was incubated with 1% Triton X-100, 5% BSA in PBS containing 3.5 mM TCEP HCl for 1 h at room temperature to block non-specific protein binding. To bind biotinylated proteins, avidin-coated latex surface was incubated with biotinylated proteins (0.8  $\mu$ M for YFP amino-terminal swapping assay and 0.2  $\mu$ M for in vitro phosphorylation or antibody binding experiments) in 0.25% Triton X-100, 2% BSA in PBS containing 20  $\mu$ g/ml aprotinin, 2 mM TCEP HCl and 0.5 mM EGTA at 4 °C overnight. Unbound proteins were cleared by washing 5 times with 0.25% Triton X-100, 5% BSA in PBS containing 20  $\mu$ g/ml aprotinin, 2 mM TCEP HCl and 0.5 mM EGTA.

## REFERECES

- Miyawaki, A., Griesbeck, O., Heim, R., and Tsien, R. Y. (1999). Dynamic and quantitative Ca<sup>2+</sup> measurements using improved cameleons. *Proc Natl Acad Sci U S A* *96*, 2135-2140.
- Nakamoto, T., Sakai, R., Ozawa, K., Yazaki, Y., and Hirai, H. (1996). Direct binding of C-terminal region of p130Cas to SH2 and SH3 domains of Src kinase. *J Biol Chem* *271*, 8959-8965.
- Niwa, H., Yamamura, K., and Miyazaki, J. (1991). Efficient selection for high-expression transfectants with a novel eukaryotic vector. *Gene* *108*, 193-199.
- Schatz, P. J. (1993). Use of peptide libraries to map the substrate specificity of a peptide-modifying enzyme: a 13 residue consensus peptide specifies biotinylation in *Escherichia coli*. *Biotechnology (N Y)* *11*, 1138-1143.
- Shin, N. Y., Dise, R. S., Schneider-Mergener, J., Ritchie, M. D., Kilkenny, D. M., and Hanks, S. K. (2004). Subsets of the major tyrosine phosphorylation sites in Crk-associated substrate (CAS) are sufficient to promote cell migration. *J Biol Chem* *279*, 38331-38337.
- Toyoshima, H., Kozutsumi, H., Maru, Y., Hagiwara, K., Furuya, A., Mioh, H., Hanai, N., Takaku, F., Yazaki, Y., and Hirai, H. (1993). Differently spliced cDNAs of human leukocyte tyrosine kinase receptor tyrosine kinase predict receptor proteins with and without a tyrosine kinase domain and a soluble receptor protein. *Proc Natl Acad Sci U S A* *90*, 5404-5408.

## Supplemental Figure Legend

### Figure S1. Anti-Cas Antibodies

(A) Schematic description of epitope regions of three different anti-Cas antibodies.

(B)  $\alpha$ Cas1 binding to CasSD was not altered by phosphorylation of CasSD.

Equivalent portions of the samples analyzed in the first four lanes in Figure 4B were re-analyzed by  $\alpha$ Cas1 immunoblotting.

(C) Specificity of  $\alpha$ Cas1 and  $\alpha$ Cas3 immuno-reactivity.

Cells in a mono-layer culture (6-well plate) were solubilized with SDS sample buffer and equivalent portions of each sample were subjected to SDS-PAGE followed by  $\alpha$ Cas1,  $\alpha$ Cas3 and anti-actin immunoblotting. Whole blots are shown for  $\alpha$ Cas1 and  $\alpha$ Cas3.

Lane 1: Cas-deficient fibroblasts (Cas<sup>-/-</sup>). Lane 2: Cas-deficient fibroblasts transiently expressing RFP-Cas (Cas<sup>-/-</sup> + RFP-Cas). Lane 3: Cas-deficient fibroblasts transiently expressing RFP-Cas15YF (Cas<sup>-/-</sup> + RFP-Cas15YF). Lane 4: Cas-deficient fibroblasts transiently expressing GFP-Cas $\Delta$ SD (Cas<sup>-/-</sup> + GFP-Cas $\Delta$ SD). Lane 5: SYF cells.

Fig. S1

Sawada et al.

A

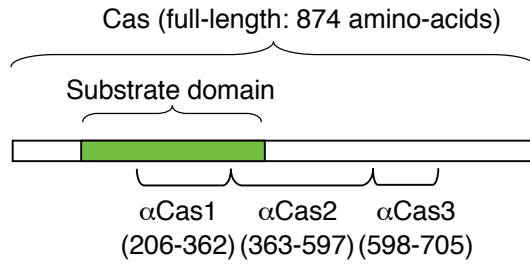

B

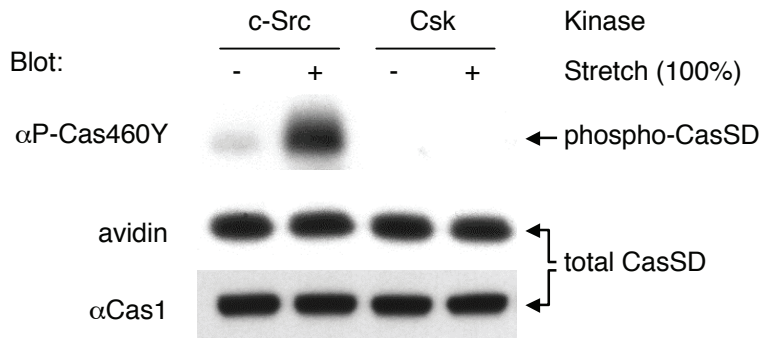

C

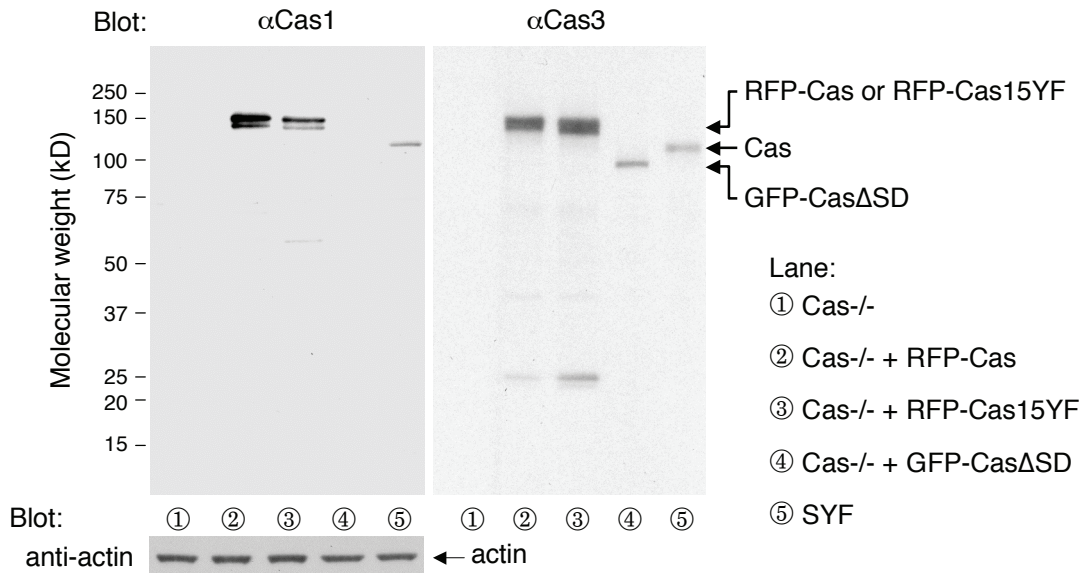

Supplement: NIHMS14427-supplement-01.pdf [file NIHMS14427-supplement-01.pdf]
